# Supplementary material for: Rapid isolation and profiling of a diverse panel of human monoclonal antibodies targeting the SARS-CoV-2 spike protein
Source: Springer Nature journal article supplement (doi:10.1038/s41591-020-0998-x), 2020-07-10
Supplement: 41591_2020_998_MOESM1_ESM.pdf [file 41591_2020_998_MOESM1_ESM.pdf]

In the format provided by the authors and unedited.

# Rapid isolation and profiling of a diverse panel of human monoclonal antibodies targeting the SARS-CoV-2 spike protein

Seth J. Zost <sup>1,14</sup>, Pavlo Gilchuk<sup>1,14</sup>, Rita E. Chen<sup>2,3</sup>, James Brett Case<sup>3</sup>, Joseph X. Reidy<sup>1</sup>, Andrew Trivette<sup>1</sup>, Rachel S. Nargi<sup>1</sup>, Rachel E. Sutton<sup>1</sup>, Naveenchandra Suryadevara<sup>1</sup>, Elaine C. Chen <sup>4</sup>, Elad Binshtein <sup>1</sup>, Swathi Shrihari <sup>3</sup>, Mario Ostrowski<sup>5</sup>, Helen Y. Chu<sup>6</sup>, Jonathan E. Didier<sup>7</sup>, Keith W. MacRenaris<sup>7</sup>, Taylor Jones<sup>1</sup>, Samuel Day<sup>1</sup>, Luke Myers <sup>1</sup>, F. Eun-Hyung Lee <sup>8</sup>, Doan C. Nguyen <sup>8</sup>, Ignacio Sanz <sup>8</sup>, David R. Martinez<sup>9</sup>, Paul W. Rothlauf<sup>10,11</sup>, Louis-Marie Bloyet<sup>11</sup>, Sean P. J. Whelan <sup>10,11</sup>, Ralph S. Baric<sup>9</sup>, Larissa B. Thackray <sup>3</sup>, Michael S. Diamond<sup>2,3,11,12</sup>, Robert H. Carnahan <sup>1,13</sup>  and James E. Crowe Jr. <sup>1,4,13</sup> 

---

<sup>1</sup>Vanderbilt Vaccine Center, Vanderbilt University Medical Center, Nashville, TN, USA. <sup>2</sup>Department of Pathology & Immunology, Washington University School of Medicine, St. Louis, MO, USA. <sup>3</sup>Department of Medicine, Washington University School of Medicine, St. Louis, MO, USA. <sup>4</sup>Department of Pathology, Microbiology, and Immunology, Vanderbilt University Medical Center, Nashville, TN, USA. <sup>5</sup>Department of Medicine, University of Toronto, Toronto, Ontario, Canada. <sup>6</sup>Division of Allergy and Infectious Diseases, University of Washington, Seattle, WA, USA. <sup>7</sup>Berkeley Lights, Inc., Emeryville, CA, USA. <sup>8</sup>Department of Medicine, Emory University, Atlanta, GA, USA. <sup>9</sup>Department of Epidemiology, University of North Carolina at Chapel Hill, Chapel Hill, NC, USA. <sup>10</sup>Program in Virology, Harvard Medical School, Boston, MA, USA. <sup>11</sup>Department of Molecular Microbiology, Washington University School of Medicine, St. Louis, MO, USA. <sup>12</sup>Andrew M. and Jane M. Bursky Center for Human Immunology and Immunotherapy Programs, Washington University School of Medicine, St. Louis, MO, USA. <sup>13</sup>Department of Pediatrics, Vanderbilt University Medical Center, Nashville, TN, USA. <sup>14</sup>These authors contributed equally: Seth J. Zost, Pavlo Gilchuk. <sup>✉</sup>e-mail: [robert.carnahan@vumc.org](mailto:robert.carnahan@vumc.org); [james.crowe@vumc.org](mailto:james.crowe@vumc.org)

**Supplemental Table 1. Workflows used to isolate SARS-CoV-2 specific human mAbs from single B cells**

| Single B cell technique | Ag used for cell sorting                 | Feeder layer stimulation | Functional screen on instrument | Sequencing technique<br>(cDNA used)          | Screening, sequencing, cloning information                                                                                                                                                                                                                                                                                  |
|-------------------------|------------------------------------------|--------------------------|---------------------------------|----------------------------------------------|-----------------------------------------------------------------------------------------------------------------------------------------------------------------------------------------------------------------------------------------------------------------------------------------------------------------------------|
| Beacon                  | S2P <sub>ecto</sub> +/- S <sub>RBD</sub> | +                        | S2P <sub>ecto</sub> binding     | PacBio SMRT or Sanger<br><br>(PCR amplicon)  | <p>Cells loaded to instrument: ~14,000</p> <p>Cells in pens for screen: ~4,000</p> <p>% Ag-reactive: ~55%</p> <p>Cells exported: 288</p> <p>V<sub>H</sub>:V<sub>L</sub> paired sequences recovered: 156</p> <p>mAbs cloned and expressed: 96</p> <p>Ag-reactive mAbs: 78</p> <p>Directly cloned cDNA in pMCis_G1 vector</p> |
|                         |                                          |                          | RBD-mFc binding                 |                                              |                                                                                                                                                                                                                                                                                                                             |
|                         |                                          |                          | RBD-mFc binding + ACE2 blocking |                                              |                                                                                                                                                                                                                                                                                                                             |
| Chromium                | S2P <sub>ecto</sub>                      | +                        | na                              | Illumina Novaseq<br><br>(Chromium libraries) | <p>Cells sequenced: ~4,500 unstimulated<br/>~40,000 stimulated</p> <p>Number of mAbs synthesized: 761</p> <p>Ag-reactive mAbs: 311</p> <p>% Ag-reactive synthesized mAbs: ~41%</p> <p>Synthesized cDNA in pTwist-mCis_G1 vector</p>                                                                                         |
|                         |                                          | -                        |                                 |                                              |                                                                                                                                                                                                                                                                                                                             |
|                         | S <sub>RBD</sub>                         | +                        |                                 |                                              |                                                                                                                                                                                                                                                                                                                             |
|                         |                                          | -                        |                                 |                                              |                                                                                                                                                                                                                                                                                                                             |

| <b>Supplemental Table 2. Summary of electron microscopy data collection and statistics SARS-CoV-2 S2P<sub>ecto</sub> protein</b> |                               |             |
|----------------------------------------------------------------------------------------------------------------------------------|-------------------------------|-------------|
| Microscope setting                                                                                                               | Microscope                    | TF-20       |
|                                                                                                                                  | Voltage (kV)                  | 200         |
|                                                                                                                                  | Detector                      | US-4000 CCD |
|                                                                                                                                  | Magnification                 | 50,000×     |
|                                                                                                                                  | Pixel size                    | 2.18        |
|                                                                                                                                  | Exposure (e-/Å <sup>2</sup> ) | 25          |
|                                                                                                                                  | Defocus range (μm)            | 1.5 to 1.8  |
| Data                                                                                                                             | Micrographs, #                | 122         |
|                                                                                                                                  | Particles, #                  | 3,836       |
|                                                                                                                                  | Particles, # after 2D         | 2,718       |
|                                                                                                                                  | Final particles, #            | 2,188       |
|                                                                                                                                  | Symmetry                      | C1          |

**Supplemental Table 3. Human subjects studied in this paper**

| <b>Subject type</b> | <b>Subject</b> | <b>Age<br/>(years)</b> | <b>Sex</b> | <b>City where infected</b> | <b>Date of symptom onset</b> | <b>Date of blood sample collection<br/><br/>(days after symptom onset)</b> |
|---------------------|----------------|------------------------|------------|----------------------------|------------------------------|----------------------------------------------------------------------------|
| COVID-19            | 1              | 35                     | M          | Wuhan                      | Jan. 15, 2020                | February 19, 2020<br>(35 days)                                             |
|                     | 2              | 52                     | F          | Beijing                    | Feb. 1, 2020                 | March 8, 2020<br>(36 days)                                                 |
|                     | 3              | 56                     | M          | Wuhan                      | Jan. 20, 2020                | March 10, 2020<br>(50 days)                                                |
|                     | 4              | 56                     | F          | Wuhan                      | Jan. 20, 2020                | March 10, 2020<br>(50 days)                                                |
| Healthy donors      | 5              | 58                     | M          | na                         | na                           | March 12, 2020<br>(na)                                                     |
|                     | 6              | Unknown                | Unknown    | na                         | na                           | Unknown, commercially sourced healthy donor sample                         |

na: indicates not applicable
